# Supplementary material
Source: bioRxiv or medRxiv preprint supplement (https://www.biorxiv.org/highwire/filestream/80872/field_highwire_adjunct_files/0/264101-1.pdf)
Supplement: Supplementary file [file 264101-1.pdf]

**Supplementary Table 1:** RNAseq datasets used for assembly and expression analyses.

This information is provided as a separate tab-separated file (Supplementary.Table.1.txt)

**Supplementary Table 2:** Ratio of polymorphism (poly) or divergence (div) on each chromosome versus genome-wide for each species. Polymorphism is the number of pairwise differences within a species, divergence is the pairwise differences between the species and *Semiaquilegia*. Both are calculated at fourfold degenerate sites.

| species              | ratio type | Chr_01 | Chr_02 | Chr_03 | Chr_04 | Chr_05 | Chr_06 | Chr_07 |
|----------------------|------------|--------|--------|--------|--------|--------|--------|--------|
| <i>A. pubescens</i>  | poly       | 0.310  | 1.154  | 1.167  | 1.774  | 1.058  | 1.109  | 1.112  |
|                      | div        | 0.971  | 0.973  | 1.004  | 1.204  | 0.972  | 1.014  | 1.008  |
| <i>A. barnebyi</i>   | poly       | 0.915  | 0.868  | 0.979  | 2.053  | 0.968  | 0.958  | 0.979  |
|                      | div        | 0.974  | 0.973  | 1.004  | 1.206  | 0.972  | 1.016  | 1.003  |
| <i>A. aurea</i>      | poly       | 0.956  | 0.790  | 0.807  | 1.601  | 1.121  | 1.834  | 0.450  |
|                      | div        | 0.977  | 0.969  | 1.006  | 1.190  | 0.980  | 1.010  | 1.002  |
| <i>A. vulgaris</i>   | poly       | 0.920  | 1.239  | 0.693  | 1.926  | 0.806  | 1.025  | 1.091  |
|                      | div        | 0.977  | 0.971  | 1.005  | 1.189  | 0.982  | 1.008  | 1.001  |
| <i>A. sibirica</i>   | poly       | 0.681  | 0.436  | 2.489  | 1.055  | 1.034  | 0.317  | 0.838  |
|                      | div        | 0.979  | 0.970  | 1.003  | 1.205  | 0.979  | 1.004  | 1.003  |
| <i>A. formosa</i>    | poly       | 0.958  | 0.996  | 1.020  | 1.641  | 0.927  | 0.879  | 1.003  |
|                      | div        | 0.976  | 0.973  | 1.004  | 1.205  | 0.970  | 1.012  | 1.006  |
| <i>A. japonica</i>   | poly       | 0.931  | 1.031  | 0.884  | 1.790  | 0.984  | 1.080  | 0.868  |
|                      | div        | 0.977  | 0.962  | 1.005  | 1.204  | 0.984  | 1.008  | 1.002  |
| <i>A. oxysepala</i>  | poly       | 1.627  | 0.661  | 0.542  | 6.182  | 0.495  | 0.350  | 0.424  |
|                      | div        | 0.974  | 0.969  | 1.001  | 1.192  | 0.987  | 1.007  | 1.006  |
| <i>A. longissima</i> | poly       | 1.630  | 0.649  | 0.691  | 2.780  | 0.872  | 0.486  | 0.869  |
|                      | div        | 0.974  | 0.971  | 1.001  | 1.205  | 0.977  | 1.011  | 1.005  |
| <i>A. chrysantha</i> | poly       | 0.936  | 1.051  | 0.979  | 1.776  | 0.928  | 0.913  | 0.946  |
|                      | div        | 0.975  | 0.972  | 1.002  | 1.211  | 0.974  | 1.015  | 1.002  |
| mean                 | poly       | 0.986  | 0.887  | 1.025  | 2.258  | 0.919  | 0.895  | 0.858  |
|                      | div        | 0.975  | 0.970  | 1.004  | 1.201  | 0.978  | 1.011  | 1.004  |

**Supplementary Table 3:** Proportion of significantly-varying subtrees by chromosome - corrected for 217 tests

| Subtree             | Proportion of window trees with subtree |      |      |      |      |      |      | Genome | Corrected p-val |
|---------------------|-----------------------------------------|------|------|------|------|------|------|--------|-----------------|
|                     | Chromosome                              |      |      |      |      |      |      |        |                 |
|                     | 1                                       | 2    | 3    | 4    | 5    | 6    | 7    |        |                 |
| japon/sib           | 0.49                                    | 0.51 | 0.47 | 0.14 | 0.48 | 0.53 | 0.43 | 0.45   | 3.7E-19         |
| aur/japon/sib/vul   | 0.36                                    | 0.35 | 0.31 | 0.07 | 0.35 | 0.38 | 0.31 | 0.31   | 2.4E-12         |
| japon/oxy           | 0.23                                    | 0.24 | 0.29 | 0.47 | 0.25 | 0.19 | 0.22 | 0.26   | 3.6E-10         |
| oxy basal           | 0.37                                    | 0.29 | 0.27 | 0.10 | 0.32 | 0.36 | 0.31 | 0.30   | 7.0E-09         |
| N. Americans        | 0.02                                    | 0.05 | 0.02 | 0.11 | 0.03 | 0.02 | 0.05 | 0.04   | 3.0E-06         |
| aur/japon/oxy       | 0.01                                    | 0.01 | 0.01 | 0.05 | 0.00 | 0.00 | 0.00 | 0.01   | 2.6E-04         |
| bar/chr/for/lon/pub | 0.97                                    | 0.97 | 0.97 | 0.90 | 0.98 | 0.96 | 0.97 | 0.96   | 6.2E-03         |
| bar/pub             | 0.26                                    | 0.12 | 0.17 | 0.13 | 0.13 | 0.17 | 0.17 | 0.17   | 6.6E-03         |
| japon/oxy/sib       | 0.09                                    | 0.17 | 0.14 | 0.24 | 0.12 | 0.14 | 0.14 | 0.14   | 2.9E-02         |
| japon/sib/vul       | 0.10                                    | 0.06 | 0.05 | 0.02 | 0.08 | 0.11 | 0.10 | 0.07   | 3.9E-02         |

**Supplementary Table 4:** P-values of proportion tests by chromosome for significantly-different trees - corrected for 70 tests

| Subtree           | Corrected p-value |        |        |                |        |        |        |
|-------------------|-------------------|--------|--------|----------------|--------|--------|--------|
|                   | Chr_01            | Chr_02 | Chr_03 | Chr_04         | Chr_05 | Chr_06 | Chr_07 |
| japon/sib         | 1                 | 1      | 1      | <b>9.2E-19</b> | 1      | 0.95   | 1      |
| aur/japon/sib/vul | 1                 | 1      | 1      | <b>2.3E-13</b> | 1      | 1      | 1      |
| japon/oxy         | 1                 | 1      | 1      | <b>7.5E-10</b> | 1      | 1      | 1      |
| oxy basal         | 0.3               | 1      | 1      | <b>6.7E-09</b> | 1      | 1      | 1      |
| oxy/sib           | 1                 | 1      | 1      | <b>3.1E-05</b> | 1      | 1      | 1      |
| N.America         | 1                 | 1      | 1      | <b>3.9E-04</b> | 1      | 1      | 1      |
| aur/japon/oxy     | 1                 | 1      | 1      | <b>7.5E-04</b> | 1      | 1      | 1      |
| japon/oxy/sib     | 0.7               | 1      | 1      | <b>9.9E-03</b> | 1      | 1      | 1      |
| japon/sib/vul     | 1                 | 1      | 1      | 8.9E-02        | 1      | 1      | 1      |
| bar/pub           | <b>0.002</b>      | 1      | 1      | 1              | 1      | 1      | 1      |

**Supplementary Table 5:** Sharing pattern percentages by pattern type

| Sharing depth | Sharing pattern | Percentage of shared variants |      |      |      |      |      |      |        |
|---------------|-----------------|-------------------------------|------|------|------|------|------|------|--------|
|               |                 | Chromosome                    |      |      |      |      |      |      | genome |
|               |                 | 1                             | 2    | 3    | 4    | 5    | 6    | 7    |        |
| shallow       | within N.Am     | 36.4                          | 36.8 | 37.8 | 32.9 | 37.4 | 36.7 | 37.2 | 36.8   |
|               | within Asia     | 10.7                          | 10.6 | 11.0 | 12.7 | 10.6 | 10.7 | 10.1 | 10.8   |
|               | within Europe   | 5.5                           | 5.1  | 4.4  | 5.2  | 4.7  | 5.2  | 4.6  | 4.9    |
| deep          | N.Am and Asia   | 7.4                           | 7.1  | 7.1  | 7.6  | 7.2  | 6.8  | 7.0  | 7.1    |
|               | Europe and N.Am | 3.3                           | 3.6  | 3.7  | 3.7  | 3.3  | 3.9  | 3.3  | 3.5    |
|               | Europe and Asia | 14.7                          | 14.2 | 14.7 | 13.2 | 15.1 | 14.5 | 15.5 | 14.7   |
| very deep     | among all       | 22.0                          | 22.6 | 21.4 | 24.6 | 21.7 | 22.3 | 22.2 | 22.2   |

**Supplementary Table 6:** D statistics for all tests

This information is provided as a separate tab-separated file (Supplementary.Table.6.txt)

**Supplementary Table 7:** Tree topology proportions simulated under asymmetric and unidirectional models

| gene flow      | m                    | N     | sib-japon | japon-oxy | sib-oxy | D-stat |
|----------------|----------------------|-------|-----------|-----------|---------|--------|
| asymmetric     | $2 \times 10^{-5}$   | 8333  | 0.53      | 0.31      | 0.15    | 0.35   |
|                | $2 \times 10^{-5}$   | 16666 | 0.41      | 0.40      | 0.18    | 0.38   |
|                | $4 \times 10^{-5}$   | 16666 | 0.30      | 0.49      | 0.21    | 0.40   |
|                | $2 \times 10^{-5}$   | 33332 | 0.30      | 0.49      | 0.21    | 0.40   |
| unidirectional | $5 \times 10^{-5}$   | 10000 | 0.53      | 0.30      | 0.15    | 0.33   |
|                | $5 \times 10^{-5}$   | 20000 | 0.40      | 0.43      | 0.17    | 0.43   |
|                | $7.5 \times 10^{-5}$ | 20000 | 0.31      | 0.51      | 0.17    | 0.50   |
|                | $5 \times 10^{-5}$   | 30000 | 0.31      | 0.51      | 0.17    | 0.50   |

**Supplementary Table 8:** Robustness of nucleotide diversity patterns to duplication detection methods.

| Method                | Species              | Percent nucleotide diversity |       |       |       |       |       |       |        |
|-----------------------|----------------------|------------------------------|-------|-------|-------|-------|-------|-------|--------|
|                       |                      | Chromosome                   |       |       |       |       |       |       | genome |
|                       |                      | 1                            | 2     | 3     | 4     | 5     | 6     | 7     |        |
| 0.15log cov           | <i>A. pubescens</i>  | 0.027                        | 0.097 | 0.092 | 0.151 | 0.098 | 0.092 | 0.096 | 0.084  |
|                       | <i>A. barnebyi</i>   | 0.053                        | 0.055 | 0.046 | 0.086 | 0.050 | 0.046 | 0.047 | 0.051  |
|                       | <i>A. aurea</i>      | 0.009                        | 0.005 | 0.005 | 0.001 | 0.012 | 0.017 | 0.001 | 0.007  |
|                       | <i>A. vulgaris</i>   | 0.103                        | 0.120 | 0.071 | 0.156 | 0.087 | 0.103 | 0.113 | 0.101  |
|                       | <i>A. sibirica</i>   | 0.018                        | 0.005 | 0.084 | 0.033 | 0.025 | 0.005 | 0.017 | 0.027  |
|                       | <i>A. formosa</i>    | 0.123                        | 0.112 | 0.116 | 0.165 | 0.111 | 0.122 | 0.112 | 0.118  |
|                       | <i>A. japonica</i>   | 0.144                        | 0.152 | 0.143 | 0.247 | 0.149 | 0.151 | 0.144 | 0.151  |
|                       | <i>A. oxysepala</i>  | 0.042                        | 0.005 | 0.002 | 0.116 | 0.002 | 0.001 | 0.001 | 0.015  |
|                       | <i>A. longissima</i> | 0.029                        | 0.007 | 0.008 | 0.037 | 0.010 | 0.003 | 0.013 | 0.014  |
|                       | <i>A. chrysantha</i> | 0.097                        | 0.106 | 0.088 | 0.161 | 0.097 | 0.087 | 0.095 | 0.098  |
| CNV detection         | <i>A. pubescens</i>  | 0.094                        | 0.332 | 0.316 | 0.446 | 0.289 | 0.293 | 0.290 | 0.264  |
|                       | <i>A. barnebyi</i>   | 0.196                        | 0.195 | 0.182 | 0.351 | 0.201 | 0.197 | 0.192 | 0.198  |
|                       | <i>A. aurea</i>      | 0.030                        | 0.025 | 0.023 | 0.017 | 0.025 | 0.055 | 0.013 | 0.027  |
|                       | <i>A. vulgaris</i>   | 0.225                        | 0.295 | 0.132 | 0.343 | 0.190 | 0.241 | 0.245 | 0.223  |
|                       | <i>A. sibirica</i>   | 0.055                        | 0.020 | 0.169 | 0.034 | 0.091 | 0.028 | 0.061 | 0.072  |
|                       | <i>A. formosa</i>    | 0.305                        | 0.316 | 0.317 | 0.436 | 0.301 | 0.307 | 0.316 | 0.314  |
|                       | <i>A. japonica</i>   | 0.307                        | 0.305 | 0.275 | 0.551 | 0.309 | 0.345 | 0.296 | 0.312  |
|                       | <i>A. oxysepala</i>  | 0.099                        | 0.033 | 0.027 | 0.251 | 0.020 | 0.015 | 0.018 | 0.046  |
|                       | <i>A. longissima</i> | 0.079                        | 0.032 | 0.026 | 0.107 | 0.033 | 0.022 | 0.040 | 0.043  |
|                       | <i>A. chrysantha</i> | 0.306                        | 0.318 | 0.282 | 0.421 | 0.305 | 0.301 | 0.305 | 0.306  |
| tandem duplicates     | <i>A. pubescens</i>  | 0.082                        | 0.340 | 0.324 | 0.473 | 0.322 | 0.288 | 0.305 | 0.282  |
|                       | <i>A. barnebyi</i>   | 0.191                        | 0.197 | 0.191 | 0.364 | 0.200 | 0.176 | 0.190 | 0.200  |
|                       | <i>A. aurea</i>      | 0.029                        | 0.027 | 0.024 | 0.035 | 0.043 | 0.046 | 0.016 | 0.031  |
|                       | <i>A. vulgaris</i>   | 0.214                        | 0.293 | 0.164 | 0.403 | 0.198 | 0.217 | 0.238 | 0.228  |
|                       | <i>A. sibirica</i>   | 0.054                        | 0.033 | 0.184 | 0.103 | 0.073 | 0.030 | 0.063 | 0.077  |
|                       | <i>A. formosa</i>    | 0.321                        | 0.325 | 0.320 | 0.483 | 0.318 | 0.309 | 0.321 | 0.328  |
|                       | <i>A. japonica</i>   | 0.296                        | 0.314 | 0.287 | 0.571 | 0.299 | 0.317 | 0.296 | 0.314  |
|                       | <i>A. oxysepala</i>  | 0.102                        | 0.037 | 0.027 | 0.319 | 0.023 | 0.018 | 0.022 | 0.055  |
|                       | <i>A. longissima</i> | 0.079                        | 0.030 | 0.037 | 0.137 | 0.039 | 0.018 | 0.041 | 0.047  |
|                       | <i>A. chrysantha</i> | 0.304                        | 0.329 | 0.291 | 0.496 | 0.302 | 0.298 | 0.312 | 0.315  |
| allele ratio in reads | <i>A. pubescens</i>  | 0.045                        | 0.201 | 0.254 | 0.471 | 0.321 | 0.289 | 0.305 | 0.241  |
|                       | <i>A. barnebyi</i>   | 0.139                        | 0.135 | 0.155 | 0.370 | 0.198 | 0.179 | 0.190 | 0.176  |
|                       | <i>A. aurea</i>      | 0.012                        | 0.007 | 0.012 | 0.039 | 0.044 | 0.047 | 0.018 | 0.023  |
|                       | <i>A. vulgaris</i>   | 0.162                        | 0.224 | 0.127 | 0.408 | 0.204 | 0.219 | 0.241 | 0.204  |
|                       | <i>A. sibirica</i>   | 0.031                        | 0.010 | 0.153 | 0.108 | 0.074 | 0.030 | 0.066 | 0.065  |
|                       | <i>A. formosa</i>    | 0.243                        | 0.230 | 0.273 | 0.476 | 0.318 | 0.308 | 0.320 | 0.290  |
|                       | <i>A. japonica</i>   | 0.225                        | 0.234 | 0.247 | 0.579 | 0.298 | 0.320 | 0.297 | 0.283  |
|                       | <i>A. oxysepala</i>  | 0.066                        | 0.009 | 0.012 | 0.329 | 0.025 | 0.019 | 0.024 | 0.043  |
|                       | <i>A. longissima</i> | 0.057                        | 0.016 | 0.027 | 0.139 | 0.040 | 0.019 | 0.041 | 0.040  |
|                       | <i>A. chrysantha</i> | 0.226                        | 0.232 | 0.249 | 0.495 | 0.303 | 0.296 | 0.310 | 0.279  |



**Supplementary Table 9: GO term enrichment**

| GO         | corrected<br>P-value   | proportion<br>Chr_04 | proportion<br>rest | number<br>Chr_04 | number<br>rest | GO term                                                                                                        |
|------------|------------------------|----------------------|--------------------|------------------|----------------|----------------------------------------------------------------------------------------------------------------|
| GO:0043531 | $5.61 \times 10^{-79}$ | 0.076                | 0.005              | 140              | 83             | ADP binding                                                                                                    |
| GO:0016705 | $4.40 \times 10^{-48}$ | 0.097                | 0.021              | 179              | 345            | oxidoreductase activity,<br>acting on paired donors,<br>with incorporation or<br>reduction of molecular oxygen |
| GO:0004497 | $7.19 \times 10^{-46}$ | 0.085                | 0.017              | 158              | 278            | monooxygenase activity                                                                                         |
| GO:0005506 | $2.73 \times 10^{-41}$ | 0.098                | 0.025              | 181              | 407            | iron ion binding                                                                                               |
| GO:0020037 | $2.57 \times 10^{-37}$ | 0.101                | 0.029              | 186              | 466            | heme binding                                                                                                   |
| GO:0010333 | $1.72 \times 10^{-15}$ | 0.021                | 0.002              | 39               | 39             | terpene synthase activity                                                                                      |
| GO:0016829 | $2.08 \times 10^{-13}$ | 0.021                | 0.003              | 39               | 48             | lyase activity                                                                                                 |
| GO:0055114 | $9.53 \times 10^{-10}$ | 0.134                | 0.081              | 247              | 1305           | oxidation-reduction process                                                                                    |
| GO:0016747 | $6.66 \times 10^{-5}$  | 0.024                | 0.008              | 44               | 136            | transferase activity,<br>transferring acyl groups other<br>than amino-acyl groups                              |
| GO:0000287 | $1.23 \times 10^{-4}$  | 0.023                | 0.008              | 42               | 129            | magnesium ion binding                                                                                          |
| GO:0008152 | $2.56 \times 10^{-4}$  | 0.074                | 0.045              | 137              | 723            | metabolic process                                                                                              |
| GO:0006952 | $3.60 \times 10^{-4}$  | 0.017                | 0.005              | 32               | 86             | defense response                                                                                               |
| GO:0004674 | $4.52 \times 10^{-4}$  | 0.012                | 0.003              | 23               | 47             | protein serine/threonine<br>kinase activity                                                                    |
| GO:0016758 | $1.35 \times 10^{-3}$  | 0.024                | 0.010              | 44               | 154            | transferase activity, transferring<br>hexosyl groups                                                           |
| GO:0005622 | $4.14 \times 10^{-3}$  | 0.008                | 0.023              | 14               | 368            | intracellular                                                                                                  |
| GO:0008146 | $2.68 \times 10^{-2}$  | 0.005                | 0.000              | 9                | 8              | sulfotransferase activity                                                                                      |
| GO:0016760 | $3.72 \times 10^{-2}$  | 0.006                | 0.001              | 12               | 18             | cellulose synthase<br>(UDP-forming) activity                                                                   |

**Supplementary Table 10:** Gene content of *A. coerulea* v3.1 reference by chromosome

| Variable                               | Chr_01 | Chr_02 | Chr_03 | Chr_04 | Chr_05 | Chr_06 | Chr_07 | genome |
|----------------------------------------|--------|--------|--------|--------|--------|--------|--------|--------|
| Number of genes                        | 5041   | 4390   | 4449   | 3149   | 4786   | 3292   | 4443   | 29550  |
| Genes per Mb                           | 112    | 102    | 104    | 69     | 107    | 108    | 102    | 100    |
| Mean gene length (Mb)                  | 3629   | 3641   | 3689   | 3020   | 3712   | 3620   | 3708   | 3580   |
| Percent repetitive                     | 38.9   | 41.1   | 39.1   | 54.2   | 39.4   | 39.3   | 40.6   | 42.0   |
| Percent genes with HIGH effect variant | 25.3   | 23.8   | 23.6   | 32.3   | 24.1   | 22.1   | 23.6   | 24.7   |

**Supplementary Table 11:** Repeat family prevalence and permutation results in *A. coerulea* v3.1 genome release.

| Family             | observed<br>copy number<br>on Chr_04 | number of<br>permutations<br>with fewer | number of<br>permutations<br>with more | number of<br>permutations<br>with same |
|--------------------|--------------------------------------|-----------------------------------------|----------------------------------------|----------------------------------------|
| DNA CMC-EnSpm      | 443                                  | 1000                                    | 0                                      | 0                                      |
| DNA TcMar-Pogo     | 637                                  | 1000                                    | 0                                      | 0                                      |
| DNA hAT-Tip100     | 49                                   | 1000                                    | 0                                      | 0                                      |
| LINE CRE-II        | 1109                                 | 1000                                    | 0                                      | 0                                      |
| LINE L1            | 2038                                 | 1000                                    | 0                                      | 0                                      |
| LINE Tad1          | 90                                   | 1000                                    | 0                                      | 0                                      |
| LTR                | 377                                  | 1000                                    | 0                                      | 0                                      |
| LTR Copia          | 4341                                 | 1000                                    | 0                                      | 0                                      |
| LTR Gypsy          | 4097                                 | 1000                                    | 0                                      | 0                                      |
| SINE tRNA          | 1173                                 | 1000                                    | 0                                      | 0                                      |
| Unknown            | 28188                                | 1000                                    | 0                                      | 0                                      |
| LINE L2            | 26                                   | 994                                     | 2                                      | 4                                      |
| LINE R1            | 52                                   | 998                                     | 2                                      | 0                                      |
| DNA hAT-Ac         | 1376                                 | 991                                     | 9                                      | 0                                      |
| DNA TcMar-Stowaway | 29                                   | 951                                     | 26                                     | 23                                     |
| DNA MuLE-MuDR      | 301                                  | 961                                     | 35                                     | 4                                      |
| LTR Caulimovirus   | 148                                  | 945                                     | 46                                     | 9                                      |
| Simple repeat      | 326                                  | 935                                     | 57                                     | 8                                      |
| DNA Maverick       | 27                                   | 910                                     | 64                                     | 26                                     |
| LTR Ngaro          | 13                                   | 864                                     | 68                                     | 68                                     |
| Satellite          | 41                                   | 828                                     | 130                                    | 42                                     |
| rRNA               | 42                                   | 811                                     | 145                                    | 44                                     |
| DNA hAT            | 41                                   | 719                                     | 229                                    | 52                                     |
| LTR ERVK           | 18                                   | 665                                     | 247                                    | 88                                     |
| LINE RTE-BovB      | 14                                   | 579                                     | 305                                    | 116                                    |
| snRNA              | 12                                   | 557                                     | 311                                    | 132                                    |
| DNA MULE-MuDR      | 299                                  | 659                                     | 323                                    | 18                                     |
| RC Helitron        | 135                                  | 340                                     | 624                                    | 36                                     |
| DNA Crypton        | 11                                   | 250                                     | 641                                    | 109                                    |
| SINE?              | 80                                   | 259                                     | 700                                    | 41                                     |
| DNA PIF-Harbinger  | 270                                  | 135                                     | 848                                    | 17                                     |
| DNA TcMar          | 51                                   | 102                                     | 863                                    | 35                                     |
| LTR ERV1           | 63                                   | 48                                      | 942                                    | 10                                     |
| DNA                | 16                                   | 2                                       | 992                                    | 6                                      |
| DNA hAT-Tag1       | 381                                  | 6                                       | 993                                    | 1                                      |
| DNA Sola           | 1                                    | 0                                       | 996                                    | 4                                      |
| LINE L1-Tx1        | 4                                    | 0                                       | 999                                    | 1                                      |
| DNA Dada           | 0                                    | 0                                       | 1000                                   | 0                                      |

**Supplementary Table 12:** Model output of linear models between polymorphism and gene density (genic bp/cM) by chromosome.

| species             | chromosome | P-value | adjusted Rsquared |
|---------------------|------------|---------|-------------------|
| <i>A. formosa</i>   | Chr_01     | 0.32    | 0.040             |
|                     | Chr_02     | 0.19    | 0.073             |
|                     | Chr_03     | 0.63    | 0.010             |
|                     | Chr_04     | 0.91    | 0.000             |
|                     | Chr_05     | 0.98    | 0.000             |
|                     | Chr_06     | 0.98    | 0.000             |
|                     | Chr_07     | 0.78    | 0.003             |
| <i>A. pubescens</i> | Chr_01     | 0.14    | 0.085             |
|                     | Chr_02     | 0.84    | 0.002             |
|                     | Chr_03     | 0.66    | 0.008             |
|                     | Chr_04     | 0.06    | 0.106             |
|                     | Chr_05     | 0.49    | 0.018             |
|                     | Chr_06     | 0.68    | 0.011             |
|                     | Chr_07     | 0.51    | 0.016             |

**Supplementary Table 13:** Population genetics parameters by chromosome

|                                                                       | percent pairwise differences |       |       |       |       |       |       | genome |
|-----------------------------------------------------------------------|------------------------------|-------|-------|-------|-------|-------|-------|--------|
|                                                                       | chromosome                   |       |       |       |       |       |       |        |
|                                                                       | 1                            | 2     | 3     | 4     | 5     | 6     | 7     |        |
| Polymorphism<br>within<br><i>Semiaquilegia</i>                        | 0.079                        | 0.085 | 0.081 | 0.162 | 0.076 | 0.078 | 0.071 | 0.082  |
| Polymorphism<br>within<br><i>Aquilegia</i>                            | 0.92                         | 0.95  | 0.93  | 1.23  | 0.93  | 0.94  | 0.95  | 0.95   |
| Divergence<br>between<br><i>Aquilegia</i> and<br><i>Semiaquilegia</i> | 2.46                         | 2.47  | 2.47  | 2.77  | 2.48  | 2.47  | 2.47  | 2.48   |

**Supplementary Table 14:** GC content of each chromosome in the *A. coerulea* v3.1 release.

| Chromosome | proportion GC |
|------------|---------------|
| Chr_01     | 0.368         |
| Chr_02     | 0.370         |
| Chr_03     | 0.369         |
| Chr_04     | 0.370         |
| Chr_05     | 0.371         |
| Chr_06     | 0.368         |
| Chr_07     | 0.368         |

**Supplementary Table 15:** Genomic libraries included in the *A. coerulea* genome assembly and their respective assembled sequence coverage levels in *A. coerulea* v3.1 release.

| Library | Sequencing Platform | Average Read/<br>Insert Size | Read Number | Assembled Sequence<br>Coverage (x) |
|---------|---------------------|------------------------------|-------------|------------------------------------|
| FTOY    | Sanger              | 2,632 ± 200                  | 1,609,053   | 2.56                               |
| GHCH    | Sanger              | 2,638 ± 201                  | 489,984     | 0.80                               |
| FTOX    | Sanger              | 6,458 ± 677                  | 1,804,031   | 2.87                               |
| GHHF    | Sanger              | 6,460 ± 679                  | 519,264     | 0.83                               |
| FTOW    | Sanger              | 33,419 ± 3,521               | 219,070     | 0.31                               |
| GGNB    | Sanger              | 33,431 ± 3,496               | 36,768      | 0.05                               |
| COL     | Sanger              | 123,731 ± 38,119             | 95,040      | 0.17                               |
| Total   |                     |                              | 4,773,210   | 7.59                               |

**Supplementary Table 16:** Summary statistics of the output of the whole genome shotgun assembly prior to screening, removal of organelles and contaminating scaffolds and chromosome-scale pseudomolecule construction. The table shows total contigs and total assembled basepairs for each set of scaffolds greater than the size listed in the left hand column.

| Minimum Scaffold Length | Number of Scaffolds | Number of Contigs | Scaffold Size | Basepairs   | % Non-gap Basepairs |
|-------------------------|---------------------|-------------------|---------------|-------------|---------------------|
| 5 Mb                    | 14                  | 1,438             | 94,320,677    | 92,114,319  | 97.66               |
| 2.5 Mb                  | 38                  | 2,890             | 177,446,204   | 172,758,974 | 97.36               |
| 1 Mb                    | 87                  | 4,445             | 257,833,655   | 250,413,462 | 97.12               |
| 500 Kb                  | 119                 | 5,059             | 282,450,696   | 273,716,964 | 96.91               |
| 250 Kb                  | 140                 | 5,324             | 290,151,377   | 280,639,834 | 96.72               |
| 100 Kb                  | 168                 | 5,631             | 294,581,469   | 283,539,175 | 96.25               |
| 50 Kb                   | 194                 | 5,808             | 296,290,157   | 284,968,083 | 96.18               |
| 25 Kb                   | 255                 | 6,094             | 298,499,112   | 286,606,915 | 96.02               |
| 10 Kb                   | 606                 | 7,055             | 303,523,673   | 291,234,712 | 95.95               |
| 5 Kb                    | 1,202               | 8,310             | 307,762,011   | 295,088,014 | 95.88               |
| 2.5 Kb                  | 2,152               | 9,914             | 311,235,474   | 298,320,877 | 95.85               |
| 1 Kb                    | 2,226               | 10,013            | 311,372,308   | 298,443,577 | 95.85               |
| 0 bp                    | 2,529               | 10,316            | 311,527,937   | 298,599,206 | 95.85               |



**Supplementary Table 17:** Final summary assembly statistics for chromosome scale assembly.

---

|                         |                     |
|-------------------------|---------------------|
| Scaffold total          | 1,034               |
| Contig total            | 7,930               |
| Scaffold sequence total | 306.5 Mb            |
| Chromosome Sequence     | 282.6 Mb            |
| Contig sequence total   | 291.7 Mb (4.8% gap) |
| Scaffold N/L50          | 4/43.6 Mb           |
| Contig N/L50            | 797/110.9 Kb        |

---

**Supplementary Table 18:** Placement of the individual BAC clones and their contribution to the overall error rate.

| Fosmid<br>Clone ID | Length    | Chromosome | Start    | Stop     | Discrepant<br>Bases |
|--------------------|-----------|------------|----------|----------|---------------------|
| 9413               | 119658    | Chr_02     | 42736342 | 42855946 | 0                   |
| 9446               | 173129    | Chr_02     | 20577579 | 20750820 | 1                   |
| 9436               | 124874    | Chr_05     | 34205168 | 34328207 | 2                   |
| 9431               | 45731     | Chr_06     | 10559008 | 10602180 | 1                   |
| 9449               | 183288    | Chr_01     | 2756617  | 2939634  | 18                  |
| 9412               | 166127    | Chr_07     | 17866735 | 18030762 | 33                  |
| 9419               | 130227    | Chr_03     | 19399302 | 19529716 | 28                  |
| 9437               | 119406    | Chr_01     | 36503268 | 36621202 | 27                  |
| 9429               | 131322    | Chr_05     | 15731088 | 15862409 | 35                  |
| 9450               | 121062    | Chr_05     | 42742789 | 42865380 | 36                  |
| 9428               | 137275    | Chr_01     | 18470512 | 18607862 | 41                  |
| 9404               | 107650    | Chr_03     | 32268312 | 32374757 | 35                  |
| 9427               | 160464    | Chr_07     | 543990   | 704396   | 53                  |
| 9442               | 130064    | Chr_03     | 30119597 | 30129597 | 48                  |
| 9416               | 167046    | Chr_05     | 23092053 | 23258725 | 69                  |
| 9409               | 140373    | Chr_07     | 31933377 | 32073020 | 72                  |
| 9435               | 117612    | Chr_04     | 44491410 | 44609808 | 63                  |
| 9403               | 153476    | Chr_02     | 38659429 | 38811278 | 98                  |
| 9441               | 87456     | Chr_04     | 6547153  | 6628689  | 78                  |
| 9408               | 165608    | Chr_07     | 30512052 | 30676049 | 236                 |
| 9444               | 171059    | Chr_04     | 25447280 | 25613428 | 363                 |
| 9447               | 65772     | Chr_06     | 1652383  | 1717537  | 151                 |
| 9433               | 145126    | Chr_04     | 38529772 | 38643947 | 343                 |
| Total              | 3,063,805 |            |          |          |                     |

**Supplementary Table 19:** Origin of species samples used for sequencing.

| Species                                   | Native.range  | Collection.locality | Tissue.source        |
|-------------------------------------------|---------------|---------------------|----------------------|
| <i>Aquilegia aurea</i>                    | Europe        | Bulgaria            | wild                 |
| <i>A. barnebyi</i>                        | North America | Colorado, USA       | grown from wild seed |
| <i>A. chrysantha</i>                      | North America | Arizona, USA        | wild                 |
| <i>A. formosa</i>                         | North America | California, USA     | wild                 |
| <i>A. japonica</i>                        | Asia          | Jilin, China        | wild                 |
| <i>A. longissima</i>                      | North America | Texas, USA          | ?                    |
| <i>A. oxysepala</i> var. <i>oxysepala</i> | Asia          | Heilongjiang, China | wild                 |
| <i>A. pubescens</i>                       | North America | California, USA     | wild                 |
| <i>A. sibirica</i>                        | Asia          | Khazakhstan         | grown from wild seed |
| <i>A. vulgaris</i>                        | Europe        | Switzerland         | wild                 |
| <i>Semiaquilegia adoxoides</i>            | Asia          | China               | grown from wild seed |

**Supplementary Table 20:** Mean and median coverage by species.

| Species                        | Mean coverage | Median coverage |
|--------------------------------|---------------|-----------------|
| <i>A. pubescens</i>            | 58            | 46              |
| <i>A. barnebyi</i>             | 105           | 88              |
| <i>A. aurea</i>                | 116           | 97              |
| <i>A. vulgaris</i>             | 122           | 93              |
| <i>A. sibirica</i>             | 112           | 91              |
| <i>A. formosa</i>              | 122           | 100             |
| <i>A. japonica</i>             | 124           | 100             |
| <i>A. oxysepala</i>            | 116           | 87              |
| <i>A. longissima</i>           | 116           | 94              |
| <i>A. chrysantha</i>           | 116           | 94              |
| <i>Semiaquilegia adoxoides</i> | 74            | 31              |

**Supplementary Table 21:** Proportion of sites removed by each filter (sites can have more than one filter) by chromosome - for initial filtration without Semi.

| Chr    | HCov* | INDEL | JGIREP | MINCOV | MissCall | RepMask | MULTI | Unfiltered |
|--------|-------|-------|--------|--------|----------|---------|-------|------------|
| Chr_01 | 0.096 | 0.216 | 0.373  | 0.447  | 0.309    | 0.029   | 0.002 | 0.264      |
| Chr_02 | 0.101 | 0.212 | 0.394  | 0.476  | 0.311    | 0.028   | 0.002 | 0.227      |
| Chr_03 | 0.099 | 0.214 | 0.375  | 0.462  | 0.291    | 0.029   | 0.002 | 0.245      |
| Chr_04 | 0.076 | 0.230 | 0.520  | 0.702  | 0.461    | 0.028   | 0.003 | 0.071      |
| Chr_05 | 0.099 | 0.215 | 0.379  | 0.464  | 0.301    | 0.029   | 0.002 | 0.250      |
| Chr_06 | 0.103 | 0.213 | 0.377  | 0.478  | 0.330    | 0.030   | 0.002 | 0.240      |
| Chr_07 | 0.110 | 0.212 | 0.389  | 0.486  | 0.328    | 0.029   | 0.002 | 0.220      |

\*Hcov=coverage less than 0.5x log median coverage or greater than -0.5x log median coverage, INDEL= indel and +/-10bp, JGIREP=repetitive sequence, MINCOV= coverage <15, MissCall=call missing in any species, RepMask=removed by RepeatMasker, MULTI=multiallelic, Unfiltered=site retained in data

**Supplementary Table 22:** Proportion of sites removed by each filter (sites can have more than one filter) by chromosome - for final filtration with Semi.

| Chr    | HCov* | INDEL | JGIREP | MINCOV | MissCall | RepMask | MULTI | Unfiltered |
|--------|-------|-------|--------|--------|----------|---------|-------|------------|
| Chr_01 | 0.089 | 0.272 | 0.373  | 0.541  | 0.391    | 0.029   | 0.003 | 0.205      |
| Chr_02 | 0.091 | 0.265 | 0.394  | 0.575  | 0.398    | 0.028   | 0.003 | 0.176      |
| Chr_03 | 0.090 | 0.268 | 0.375  | 0.559  | 0.379    | 0.029   | 0.003 | 0.189      |
| Chr_04 | 0.054 | 0.270 | 0.520  | 0.800  | 0.572    | 0.028   | 0.004 | 0.049      |
| Chr_05 | 0.093 | 0.271 | 0.379  | 0.546  | 0.378    | 0.029   | 0.004 | 0.195      |
| Chr_06 | 0.094 | 0.269 | 0.377  | 0.561  | 0.407    | 0.030   | 0.003 | 0.186      |
| Chr_07 | 0.098 | 0.265 | 0.389  | 0.577  | 0.413    | 0.029   | 0.003 | 0.170      |

\*Hcov=coverage less than 0.5x log median coverage or greater than -0.5x log median coverage, INDEL= indel and +/-10bp, JGIREP=repetitive sequence, MINCOV= coverage <15, MissCall=call missing in any species, RepMask=removed by RepeatMasker, MULTI=multiallelic, Unfiltered=site retained in data

**Supplementary Table 23:** Number of derived variants by species.

| species              | location      | number of variants |        |        |
|----------------------|---------------|--------------------|--------|--------|
|                      |               | private            | shared | total  |
| <i>A. japonica</i>   | Asia          | 129211             | 205724 | 334935 |
| <i>A. oxysepala</i>  | Asia          | 134400             | 147923 | 282323 |
| <i>A. sibirica</i>   | Asia          | 99369              | 176177 | 275546 |
| <i>A. aurea</i>      | Europe        | 107824             | 176951 | 284775 |
| <i>A. vulgaris</i>   | Europe        | 139849             | 189526 | 329375 |
| <i>A. barnebyi</i>   | North America | 75641              | 245644 | 321285 |
| <i>A. chrysantha</i> | North America | 87258              | 261239 | 348497 |
| <i>A. formosa</i>    | North America | 87823              | 266604 | 354427 |
| <i>A. longissima</i> | North America | 66344              | 232710 | 299054 |
| <i>A. pubescens</i>  | North America | 72661              | 265713 | 338374 |

**Supplementary Table 24:** Transition matrix for the Five-State Markov process.  $m_1$  denotes the probability of an *A. oxysepala* lineage being a migrant, while  $m_2$  denotes the probability of a *A. japonica* lineage being a migrant at a given generation.

|          | (1,1,1)       | (1,2,0)          | (1,0,2)          | (1,0,1) | (1,1,1)*      |
|----------|---------------|------------------|------------------|---------|---------------|
| (1,1,1)  | $1-(m_1+m_2)$ | $m_1$            | $m_2$            | 0       | 0             |
| (1,2,0)  | $m_2$         | $1-(2^*m_2+1/N)$ | 0                | $1/N$   | $m_2$         |
| (1,0,2)  | $m_1$         | 0                | $1-(2^*m_1+1/N)$ | $1/N$   | $m_1$         |
| (1,0,1)  | 0             | 0                | 0                | 1       | 0             |
| (1,1,1)* | 0             | $m_1$            | $m_2$            | 0       | $1-(m_1+m_2)$ |



**Supplementary Table 25:** Transition matrix for the Eight-State Markov process.  $X=(1-1/N)^T$  and  $Y=(1-3/N)^T$

|                      | (1,1,1) | (1,2,0) | (1,0,2) | (1,0,1) | (1,1,1) <sup>†</sup> | (0,1,1) | (1,1,0) | (1,1,1) <sup>*</sup> |
|----------------------|---------|---------|---------|---------|----------------------|---------|---------|----------------------|
| (1,1,1)              | 0       | 0       | 0       | 0       | X                    | 1-X     | 0       | 0                    |
| (1,2,0)              | 0       | 0       | 0       | (1-Y)/3 | Y                    | (1-Y)/3 | (1-Y)/3 | 0                    |
| (1,0,2)              | 0       | 0       | 0       | 1-X     | X                    | 0       | 0       | 0                    |
| (1,0,1)              | 0       | 0       | 0       | 1       | 0                    | 0       | 0       | 0                    |
| (1,1,1) <sup>†</sup> | 0       | 0       | 0       | 1/N     | 1-3/N                | 1/N     | 1/N     | 0                    |
| (0,1,1)              | 0       | 0       | 0       | 0       | 0                    | 1       | 0       | 0                    |
| (1,1,0)              | 0       | 0       | 0       | 0       | 0                    | 0       | 1       | 0                    |
| (1,1,1) <sup>*</sup> | 0       | 0       | 0       | 0       | X                    | 0       | 1-X     | 0                    |
